# Supplementary material for: DNMT3A clonal hematopoiesis-driver mutations induce cardiac fibrosis by paracrine activation of fibroblasts
Source: Nat Commun. 2024 Jan 19;15:606. doi: 10.1038/s41467-023-43003-w (PMC10799021; doi:10.1038/s41467-023-43003-w)
Supplement: Supplementary file 1 — Supplementary Information File [file 41467_2023_43003_MOESM1_ESM.pdf]

# Supplementary Figure 1

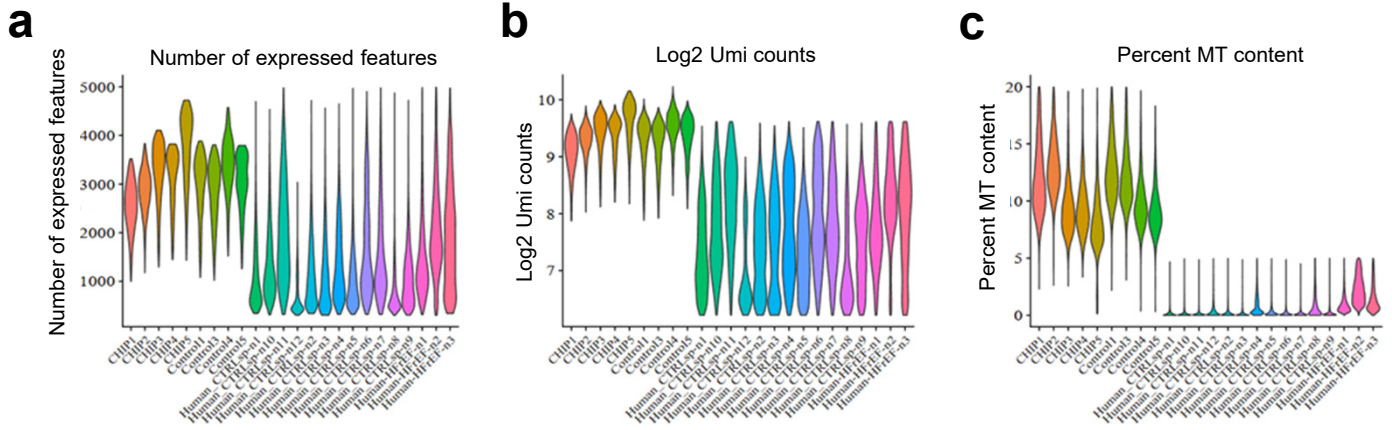

**Supplementary figure 1. Quality control of integrated snRNA- and scRNA-sequencing data.**

**a.** Violin plots depicting the number of expressed features **b.** UMI counts and percentage of **c.** mitochondrial content in individual samples.

# Supplementary Figure 2

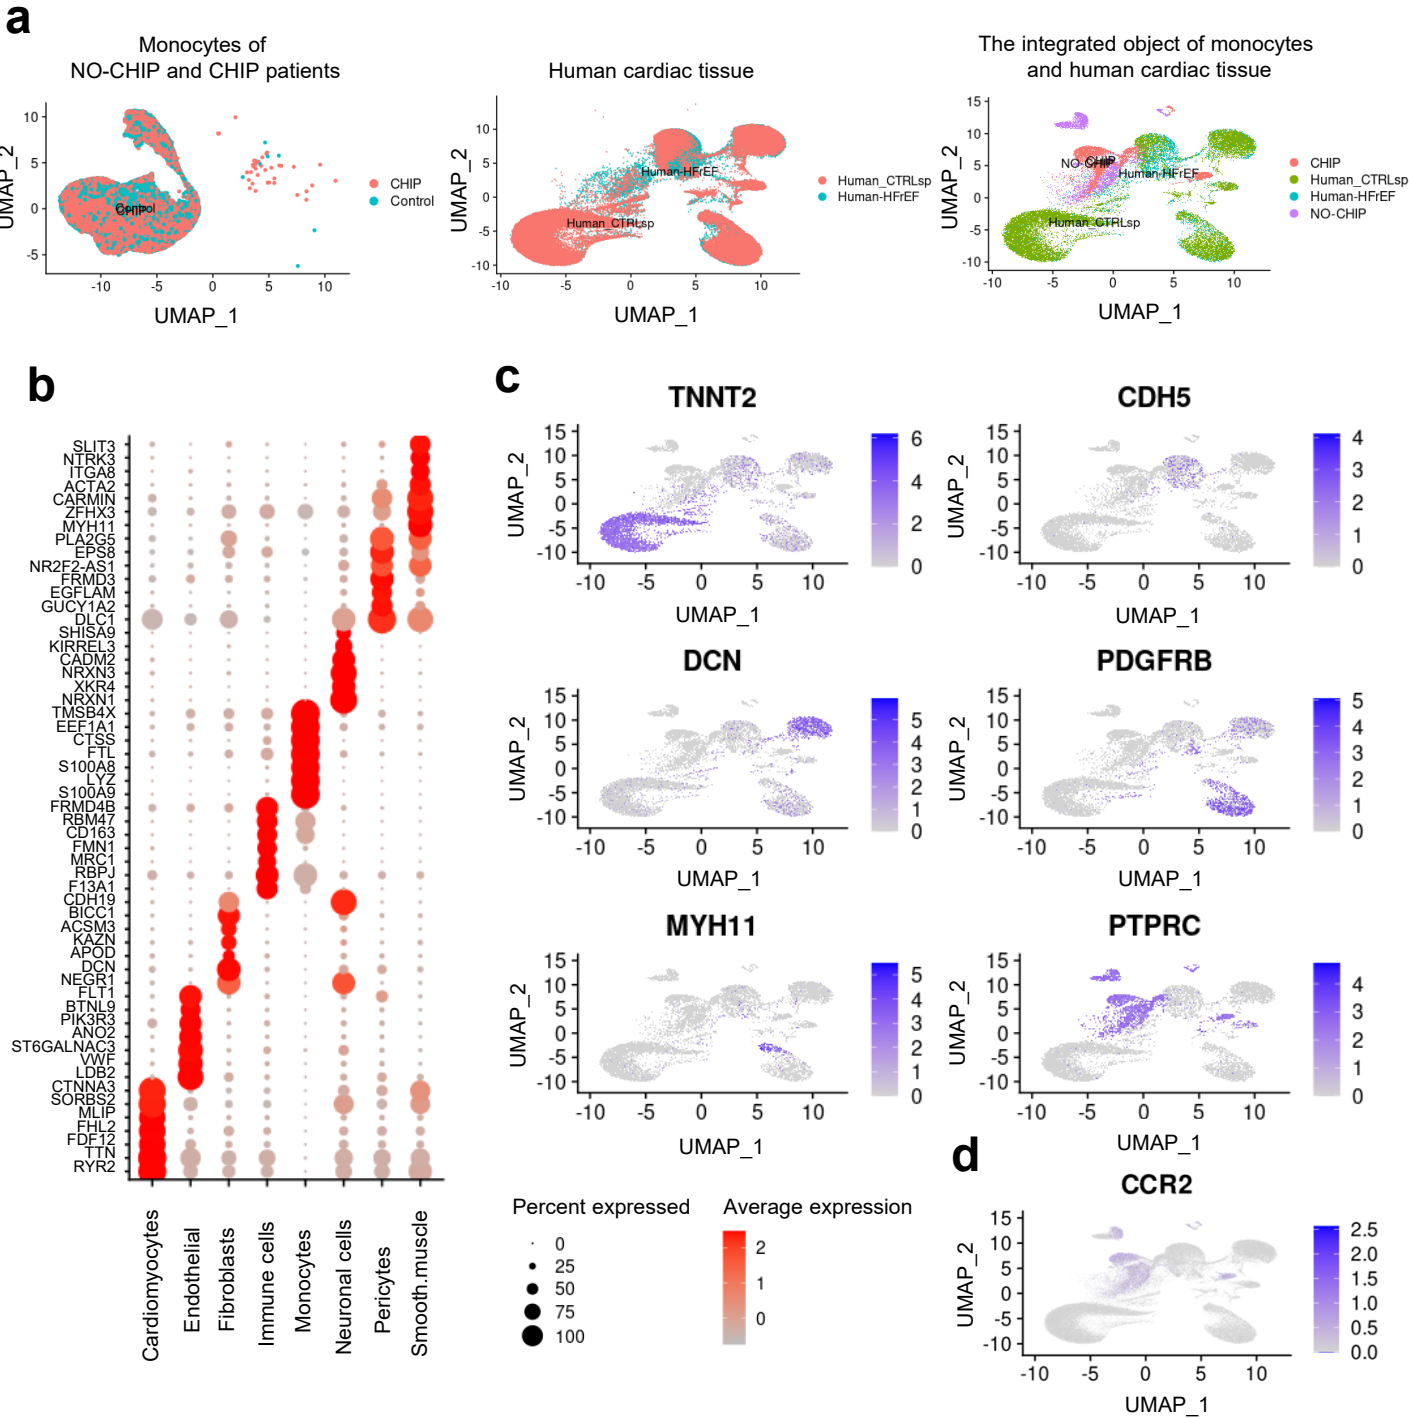

## Supplementary Figure 2. scRNA-seq and scnRNA-seq integration quality control and cell annotation

**a.** Representative uniform manifold approximation and projection (UMAP) plots before and after integration of scRNA-seq dataset from PBMC obtained from HF patients with DNMT3A CHIP and without CHIP. Left, monocytes dataset from PBMCs of No-CHIP and DNMT3A CHIP patients before integration. Middle, human healthy and HFrEF cardiac tissue dataset before integration. Right, the integrated object of the monocytes and human cardiac tissue. **b.** Dot plot depicting representative marker gene expression in each cluster. **c.** Feature plots depicting gene expression of established cell-type specific marker genes: *TNNT2* for cardiomyocytes, *CDH5* for endothelial cells, *DCN* for fibroblasts, *PDGFRB* for pericytes, *MYH11* for smooth muscle cells, *PTPRC* for leukocytes. **D.** UMAP plot showing *CCR2* expression.

# Supplementary Figure 3

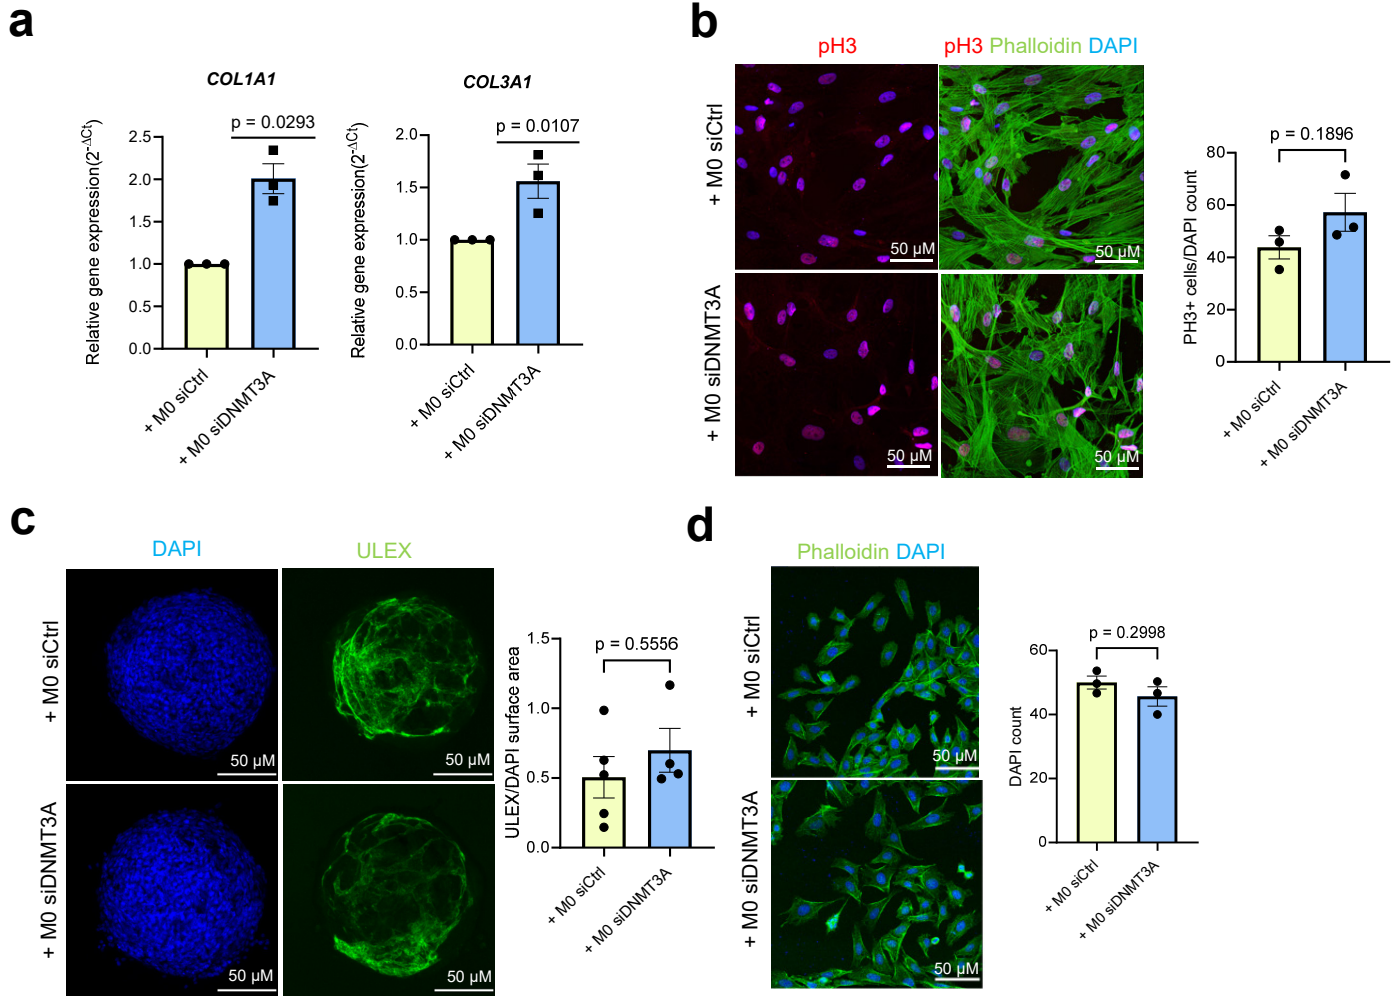

### Supplementary Figure 3. Effects of supernatants of DNMT3A silenced monocytes

**a.** qPCR analysis of *COL1A1* and *COL3A1* gene expression in HCF treated with DNMT3A-silenced THP-1 monocytes supernatants (n=3 biologically independent experiments). Source data are provided as a Source Data file. **b.** Immunofluorescence analysis of pH3 in HCF treated with DNMT3A-silenced THP-1 monocytes supernatants (n=3 biologically independent experiments). Source data are provided as a Source Data file. **c.** Immunofluorescence analysis of ULEX in cardiospheres treated with DNMT3A-silenced THP-1 monocytes supernatants (n=5 for control and n=4 for siDNMT3A as biologically independent experiments). Source data are provided as a Source Data file. **d.** Analysis of cardiomyocyte number of cells treated with DNMT3A-silenced THP-1 monocytes supernatants (n=3 biologically independent experiments). Source data are provided as a Source Data file. Data are shown as mean  $\pm$  SEM (**a-d**). Normal distribution was assessed using the Shapiro–Wilk test (**a-d**). Statistical analysis for comparison was performed using two-sided one sample t-tests (**a**) and using unpaired, two-sided Student's t-tests (**b, d**).  $t=5.710$ , 2 degrees of freedom;  $t=9.573$ , 2 degrees of freedom (**a**);  $t=1.578$ , 4 degrees of freedom (**b**);  $t=1.190$ , 4 degrees of freedom (**d**); Statistical analysis was performed using two-tailed Mann–Whitney test (**c**).

# Supplementary Figure 4

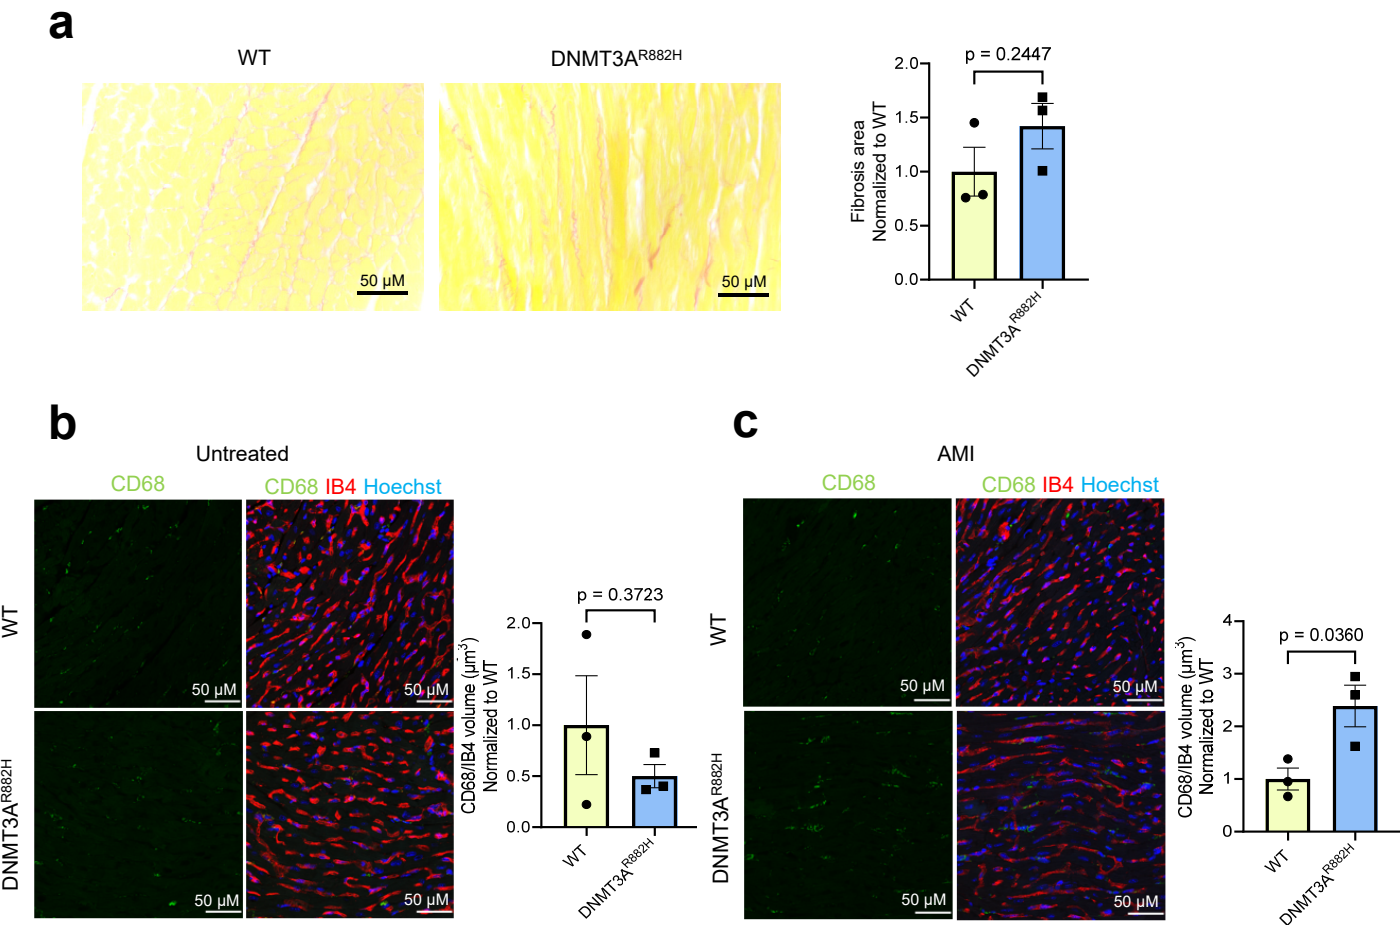

**Supplementary Figure 4. Characterization of cardiac tissue from uninjured and infarcted WT and DNMT3A<sup>R882H</sup> mice.** **a.** Analysis of diffuse fibrosis using Picrosirius red staining in cross section of the cardiac septum in WT and DNMT3A<sup>R882H</sup> mice (n=3 biologically independent experiments) (without infarction). Source data are provided as a Source Data file. **b.** Immunofluorescence analysis of CD68+ immune cell infiltration in the septum in untreated WT and DNMT3A<sup>R882H</sup> mice (n=3 biologically independent experiments). Source data are provided as a Source Data file. **c** Immunofluorescence analysis of CD68+ immune cell infiltration in the remote zone of WT and DNMT3A<sup>R882H</sup> mice after AMI (n=3 biologically independent experiments). Source data are provided as a Source Data file. Data are shown as mean  $\pm$  SEM (**a-c**). Normal distribution was assessed using the Shapiro–Wilk test (**a-c**). Statistical analysis for comparison was performed using unpaired, two-sided Student's t-tests (**a-c**).  $t=1.363$ , 4 degrees of freedom (**a**);  $t=1.004$ , 4 degrees of freedom (**b**);  $t=1.363$ , 4 degrees of freedom (**c**).

# Supplementary Figure 5

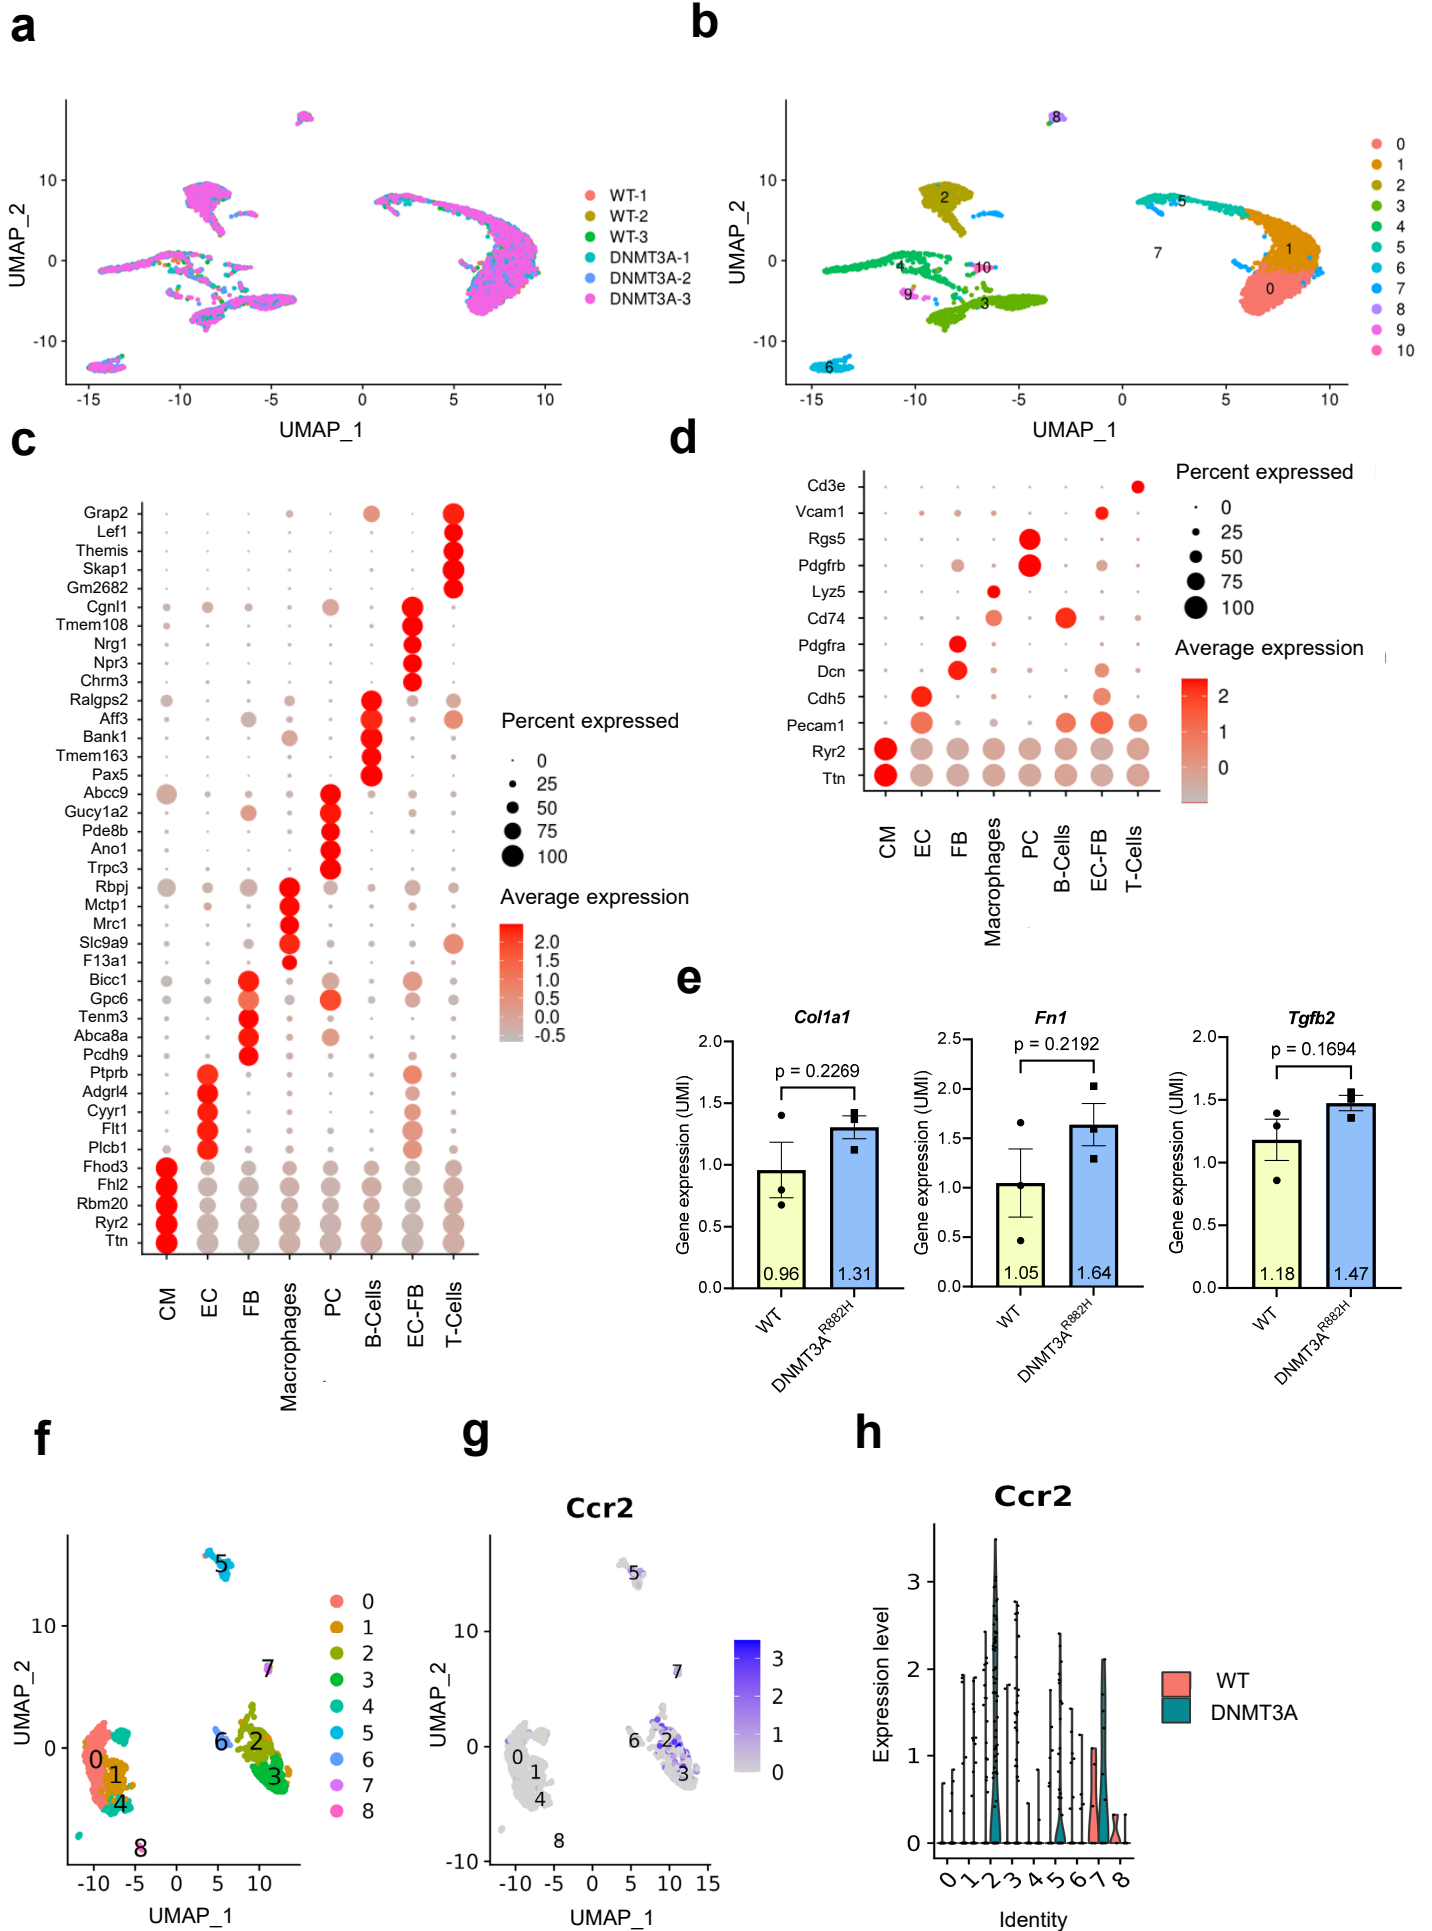

## Supplementary Figure 5. Results of single nuclei RNA sequencing of WT and DNMT3A<sup>R882H</sup> mice

**a.** Mice were exposed to infarction and hearts were collected 74-76 days post infarction for single nuclei RNA sequencing (n=3 biologically independent samples). Uniform manifold approximation and projection (UMAP) plots representing individual WT and DNMT3A<sup>R882H</sup> hearts. Individual samples are color coded. **b.** UMAP plot representing the different cell type clusters identified after integration **c.** Dot plot of representative marker gene expression in each cell type cluster **d.** Dot plot of representative marker gene expression of established cell-type specific marker genes in each cell type cluster. CM, cardiomyocytes; EC, endothelial cells; FB, fibroblasts; PC, pericytes **e.** Mean expression of *Col1a1*, *Fn1*, and *Tgfb2* in WT and DNMT3A<sup>R882H</sup> in fibroblasts of the hearts after AMI (n=3 biologically independent samples). Data are shown as mean  $\pm$  SEM. Normal distribution was assessed using the Shapiro–Wilk test. Statistical analysis was performed using unpaired, two-sided Student's t-tests.  $t=1.426$ , 4 degrees of freedom;  $t=1.456$ , 4 degrees of freedom;  $t=1.674$ , 4 degrees of freedom. Source data are provided as a Source Data file. **f.** UMAP plots representing macrophages (subclusters 2, 3, 5, 6, 7) and fibroblasts (subclusters 0, 1, 4, 8) in WT and DNMT3A<sup>R882H</sup> hearts (n=3 biologically independent samples). The different subclusters are color coded. **g.** UMAP plot showing *Ccr2* expression in the different subclusters of macrophages (subclusters 2, 3, 5, 6, 7) and fibroblasts (subclusters 0, 1, 4, 8). **h.** Violin plots showing *Ccr2* expression in the different subclusters of macrophages (subclusters 2, 3, 5, 6, 7) and fibroblasts (subclusters 0, 1, 4, 8). The genotype is color coded.

# Supplementary Figure 6

| Patient ID | Mutation     | Mutation         | VAF(%) |
|------------|--------------|------------------|--------|
| 1          | c.2644C>T    | p.Arg882Cys      | 14,1   |
| 2          | c.886G>A     | p.Val296Met      | 2,04   |
| 3          | c.2330C>T    | p.Pro777Leu      | 2,12   |
| 4          | c.1447G>A    | p.Val483Met      | 2,45   |
| 5          | c.2158C>T    | p.Arg720Cys      | 1,14   |
| 6          | c.748_754del | p.Pro250Thrfs*64 | 3,21   |
|            | c.2560G>T    | p.Glu854*        | 1,79   |

**Supplementary Figure 6. DNMT3A mutations in the 6 HF patients in the cMRI cohort; VAF - variant allele frequency.**

# Supplementary Figure 7

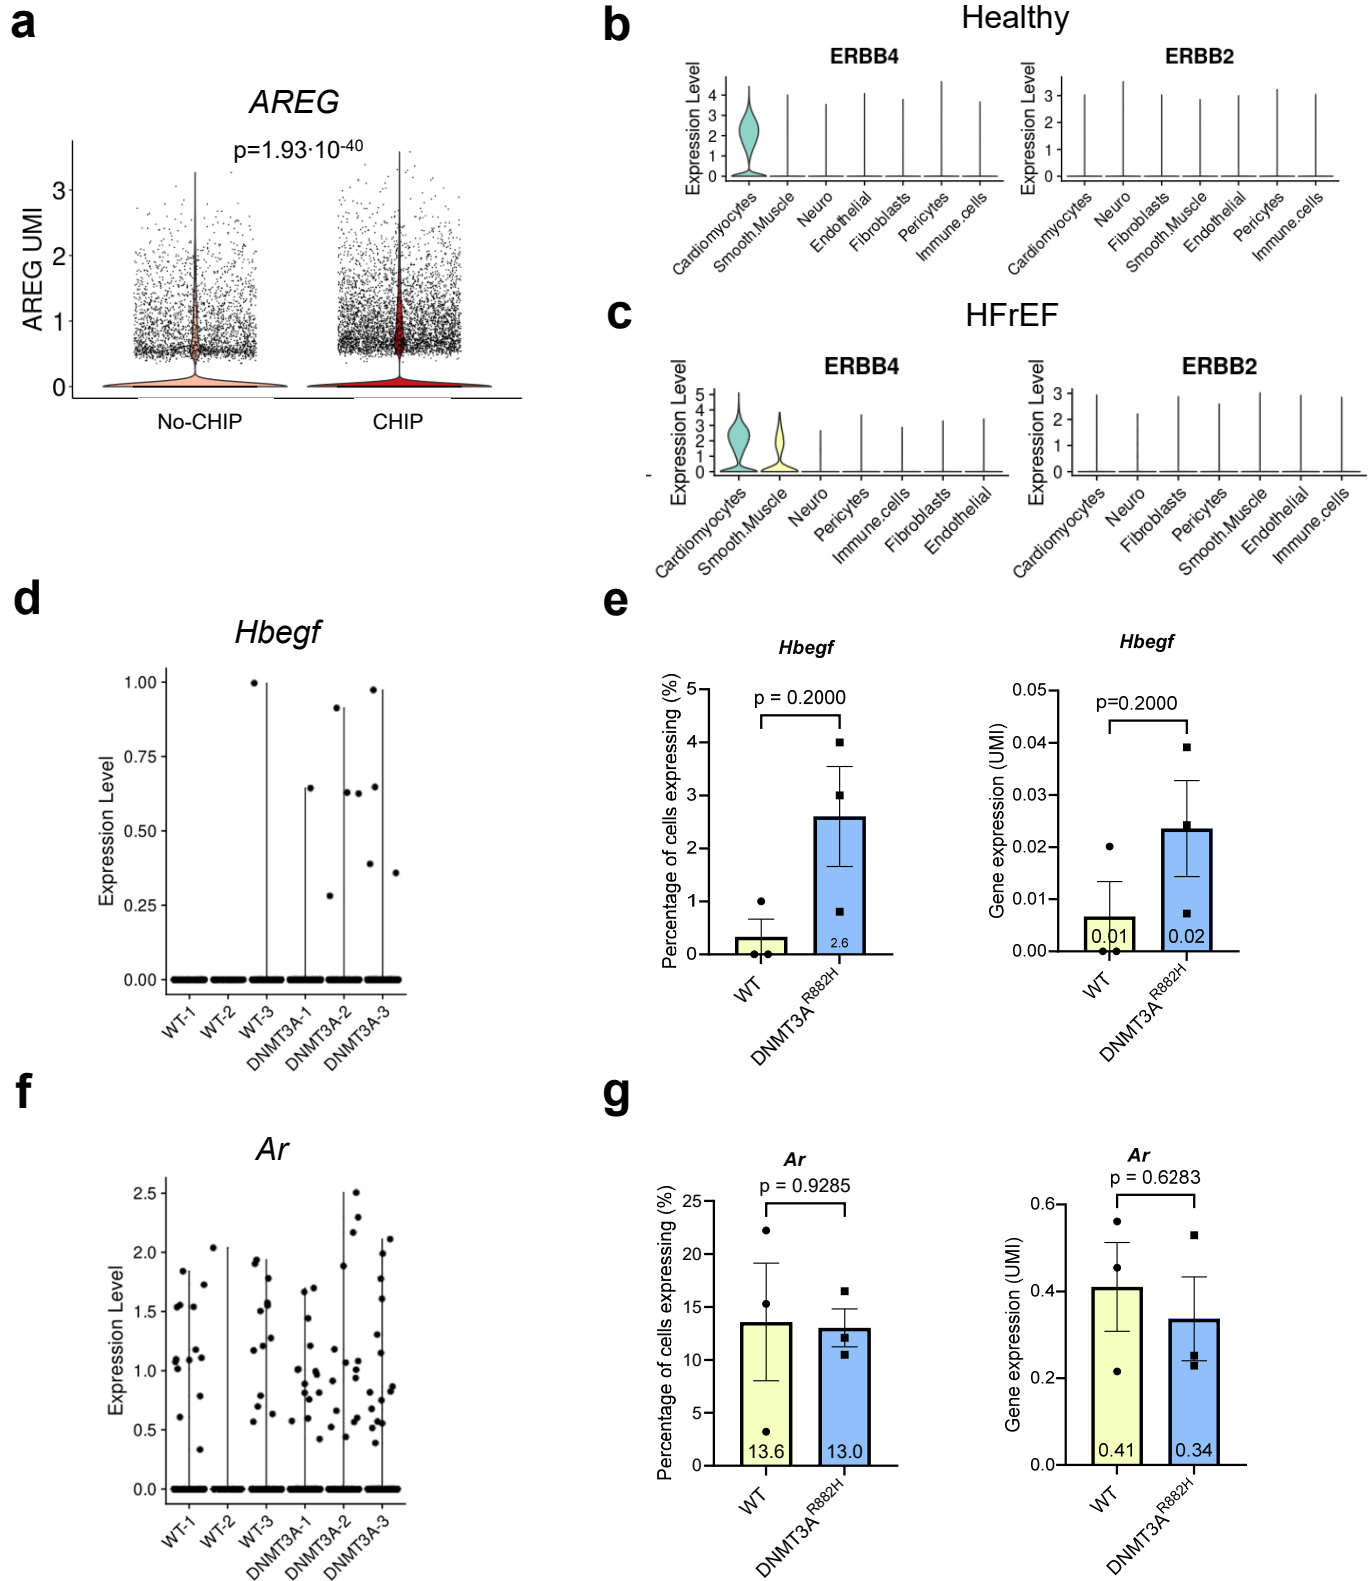

**Supplementary Figure 7. DNMT3A CHIP monocytes/macrophages interact with fibroblasts through EGFR pathway.**

**a.** Violin plot showing *AREG* gene expression in monocytes from No-CHIP and DNMT3A CHIP patients **b, c.** Violin plots depicting *ERBB4* and *ERBB2* gene expression in all the different cardiac cell types **b.** Healthy **c.** HFrEF **d.** Violin plot representing *Hbegf* gene expression in the immune cell cluster of hearts derived from WT and DNMT3A<sup>R882H</sup> mice after AMI. **e.** Percentage of cells expressing *Hbegf* and *Hbegf* mean expression in the immune cell cluster of hearts from WT and DNMT3A<sup>R882H</sup> mice after AMI (n=3 biologically independent samples). Source data are provided as a Source Data file. **f.** Violin plot representing *Ar* (Areg) gene expression in the immune cell cluster from WT and DNMT3A<sup>R882H</sup> mice after AMI **g.** Percentage of cells expressing *Ar* and *Ar* mean expression in immune cell clusters in hearts of WT and DNMT3A<sup>R882H</sup> mice after AMI (n=3 biologically independent samples). Source data are provided as a Source Data file. Data are shown as mean  $\pm$  SEM (**e,g**). Normal distribution was assessed using the Shapiro–Wilk test (**e,g**). Statistical analysis was performed using two-tailed Mann–Whitney test for **e** and unpaired, two-sided Student’s t-tests for **g**.  $t=0.09558$ , 4 degrees of freedom;  $t=0.5235$ , 4 degrees of freedom (**e**).

# Supplementary Figure 8

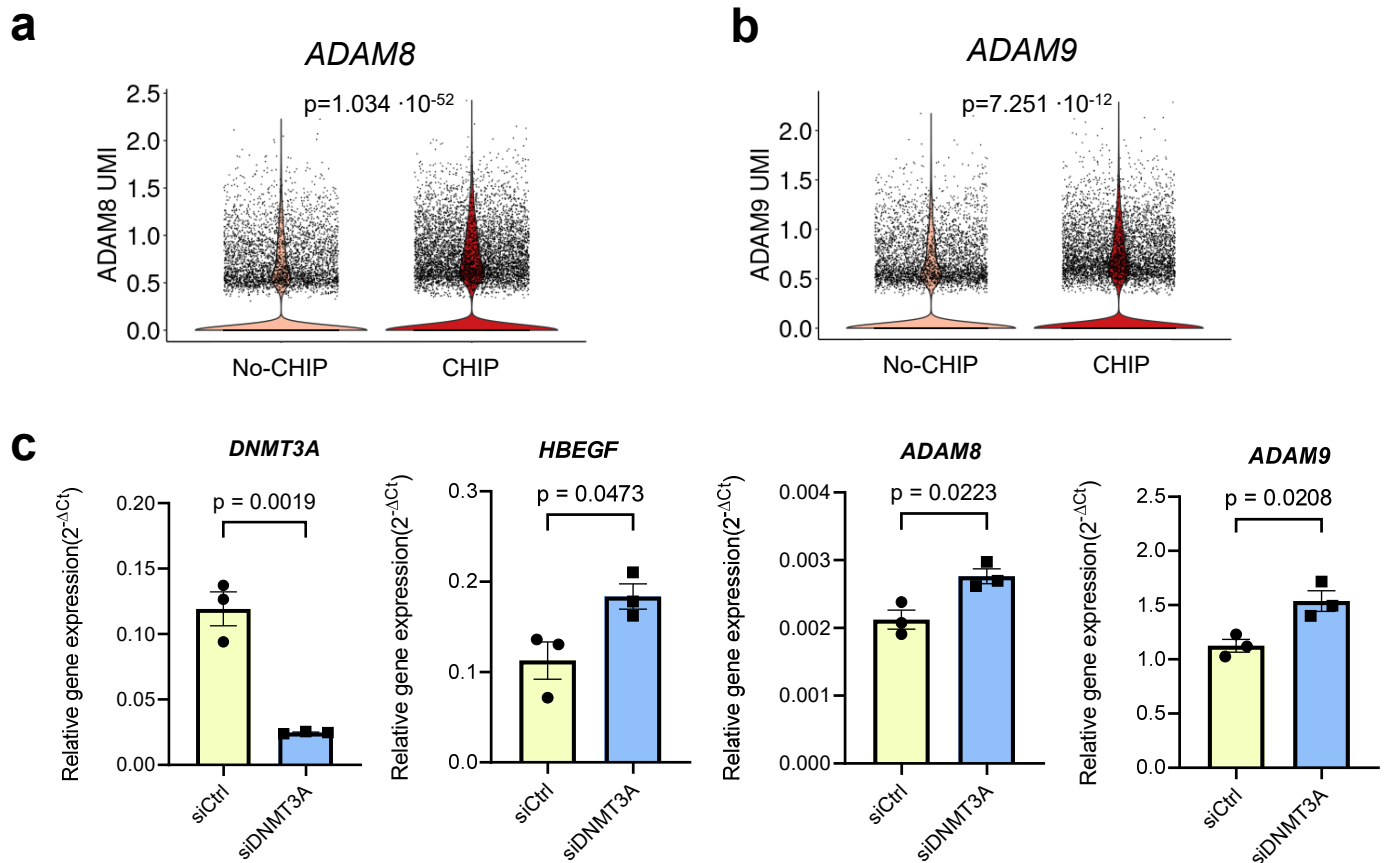

## Supplementary Figure 8. Gene expression of *HBEGF* and *HBEGF*-activating genes

**a, b.** Violin plots showing *ADAM8* and *ADAM9* gene in monocytes from No-CHIP and DNMT3A CHIP HF patients. **c.** Transcript expression analysis by qPCR of *DNMT3A*, *HBEGF*, *ADAM8* and *ADAM9* in DNMT3A-silenced THP-1 monocytes (n=3 biologically independent samples). Source data are provided as a Source Data file. Data are shown as mean  $\pm$  SEM (**c**). Normal distribution was assessed using the Shapiro–Wilk test (**c**). Statistical analysis for comparison of two groups was performed using unpaired, two-sided Student's t-tests (**c**).  $t=7.301$ , 4 degrees of freedom;  $t=2.831$ , 4 degrees of freedom;  $t=3.625$ , 4 degrees of freedom;  $t=3.704$ , 4 degrees of freedom (**c**).

# Supplementary Figure 9

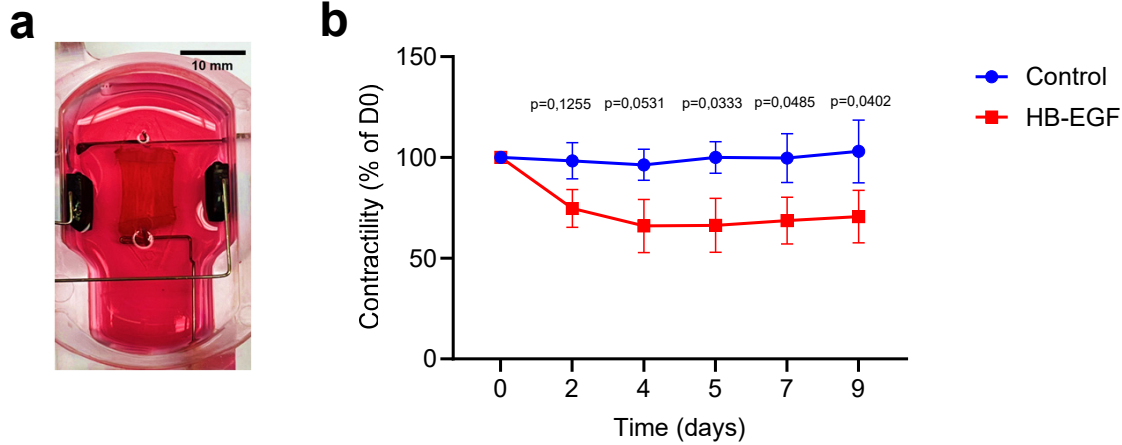

## Supplementary Figure 9. Contractility of human heart slices treated with HB-EGF

**a.** Schematic of the human heart slice **b.** Contractility of human heart slices after treatment with HB-EGF (100 ng/ml, every 2. day) over 9 days (n=3 biologically independent samples per group). Source data are provided as a Source Data file. Data are shown as mean  $\pm$  SEM (**b**). Normal distribution was assessed using the Shapiro–Wilk test (**b**). Statistical comparison was performed using two-way ANOVA with Fisher's LSD multiple comparisons posttest (**b**).

# Supplementary Figure 10

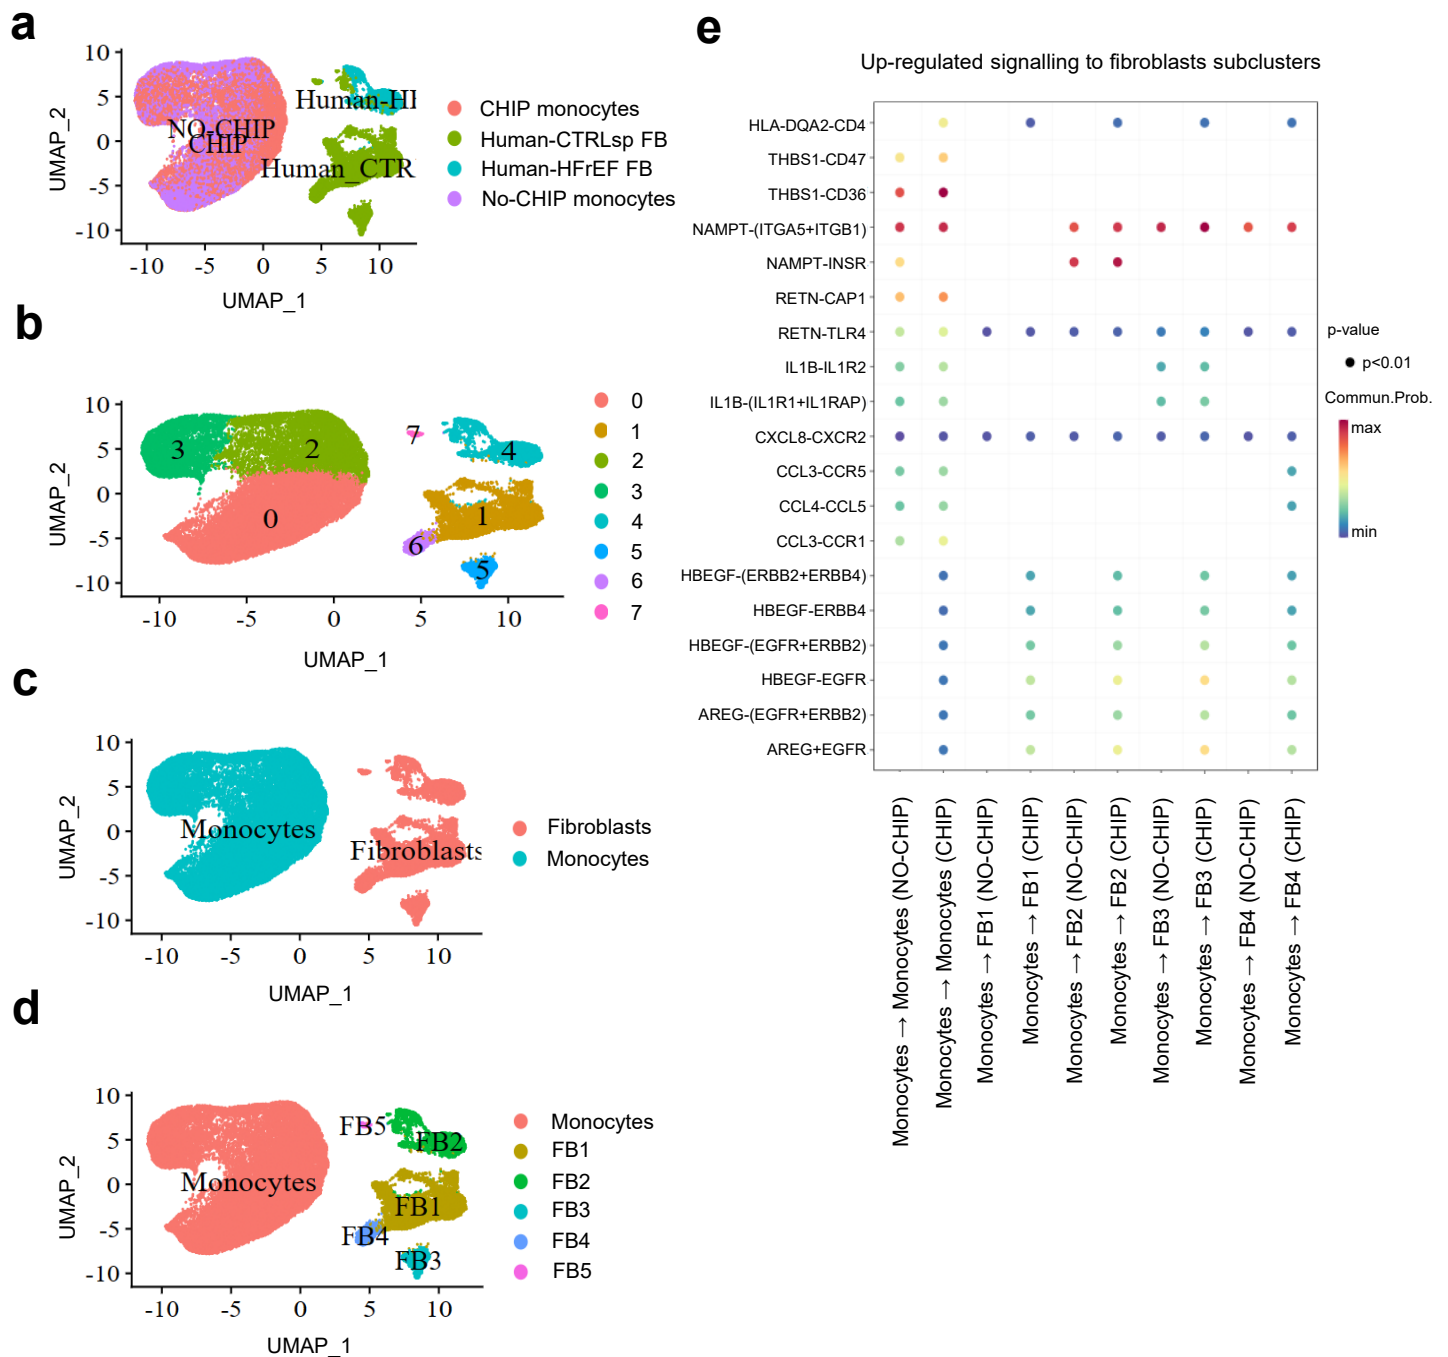

**Supplementary Figure 10. Heterogeneity of human cardiac fibroblasts in the integrated object**

**a-d.** Uniform manifold approximation and projection (UMAP) plots showing integration of DNMT3A CHIP and No-CHIP monocytes and subclusters of cardiac fibroblasts from healthy and HFrEF hearts **a**. Represents the different origin of the cells **b**. Different cellular clusters **c**. Cell annotation **d**. Subcluster annotation **e**. Bubble plots representing CHIP-upregulated ligand-receptor pairs in monocytes-to-fibroblasts subclusters. Color encodes communication probability, min. logFC for the interaction depicted is 0.1 and detection in minimum 10% of the cells.

## Supplementary Table 1. Baseline characteristics of the HFrEF cohort

### Baseline characteristics

|    | Sex                   | HFrEF | HFrEF | HFrEF |
|----|-----------------------|-------|-------|-------|
| 1  | Age (years)           | 67    | 52    | 70    |
| 2  | Sex                   | male  | male  | male  |
| 3  | Ejection fraction (%) | 12    | 29    | 40    |
| 4  | NYHA class            | 3     | 3     | 3     |
| 5  | Hypertension          | none  | none  | none  |
| 6  | Aortic valve stenosis | yes   | none  | none  |
| 7  | History of moking     | none  | none  | none  |
| 8  | Dyslipidemia          | none  | none  | none  |
| 10 | Chronic heart disease | yes   | yes   | yes   |
| 11 | Myocardial infarction | none  | yes   | yes   |
| 12 | ACE inhibitor         | none  | none  | none  |
| 13 | AT1 blocker           | yes   | none  | none  |
| 14 | Betablocker           | yes   | yes   | yes   |
| 15 | Aspirin               | yes   | yes   | yes   |
| 16 | Statin                | yes   | none  | yes   |

HFrEF, heart failure with reduced ejection fraction (HFrEF); NYHA, New York Heart Association.

## Supplementary Table 2. Baseline characteristics of the cMRI study cohort

### Baseline characteristics

|    | Characteristic                                                         | Total cohort (n = 38) | No-CHIP (n = 32) | CHIP (n = 6)   | P value (CHIP versus NO CHIP) |
|----|------------------------------------------------------------------------|-----------------------|------------------|----------------|-------------------------------|
| 1  | Age, mean (SD) (n = 38)                                                | 66.34 (9.49)          | 66.25 (9.99)     | 66.83 (6.85)   | 0.8923                        |
| 2  | Male, No. (%) (n = 38)                                                 | 30 (78.95)            | 26 (81.25)       | 4 (66.67)      | 0.587                         |
| 3  | Weight (kg), mean (SD) (n = 38)                                        | 82.47 (16.17)         | 82.81 (16.15)    | 80.67 (17.70)  | 0.77                          |
| 4  | Size (cm), mean (SD) (n = 38)                                          | 174.1 (10.96)         | 173.5 (10.93)    | 177.5 (11.52)  | 0.416                         |
| 5  | Hypertension, No. (%) (n = 34)                                         | 32 (94.12)            | 27 (96.43)       | 5 (83.33)      | 0.3262                        |
| 6  | Diabetes mellitus, No. (%) (n = 14)                                    | 6 (42.86)             | 4 (40.00)        | 2 (50.00)      | >0.9999                       |
| 7  | Smoking, No. (%) (n = 36)                                              | 24 (66.67)            | 19 (63.33)       | 5 (83.33)      | 0.6399                        |
| 8  | Valve disease, No. (%) (n = 32)                                        | 6 (18.75)             | 5 (18.52)        | 1 (20.00)      | >0.9999                       |
| 9  | Family history of coronary artery disease, No. (%) (n = 14)            | 7 (36.84)             | 6 (42.86)        | 1 (20.00)      | 0.6027                        |
| 10 | Coronary artery disease, No. (%) (n = 35)                              | 16 (45.71)            | 14 (48.28)       | 2 (33.33)      | 0.4227                        |
| 11 | Myocardial infarction, No. (%) (n = 36)                                | 7 (19.44)             | 5 (16.67)        | 2 (33.33)      | 0.5732                        |
| 12 | Myocarditis, No. (%) (n = 35)                                          | 1 (2.86)              | 0 (0)            | 1 (16.67)      | 0.1714                        |
| 13 | NYHA class, mean (SD) (n=33)                                           | 1.818 (0.7687)        | 1.926 (0.7808)   | 1.333 (0.5164) | 0.1056                        |
| 14 | NT-proBNP serum levels (pg/ml), mean (SD) (n = 31)                     | 8869 (18763)          | 7540 (16540)     | 14406 (27450)  | 0.7206                        |
| 15 | High sensitivity C-reactive protein levels (mg/dl), mean (SD) (n = 31) | 38.45 (64.43)         | 43.77 (69.15)    | 10.8 (10.5)    | 0.1466                        |
| 16 | High sensitive troponin T levels (pg/ml), mean (SD) (n = 32)           | 137.1 (294.3)         | 123 (289)        | 197.8 (338)    | 0.1768                        |
| 17 | Hemoglobin (g/dl), mean (SD) (n = 33)                                  | 128.4 (41.65)         | 133.4 (37.91)    | 105.5 (53.50)  | 0.1109                        |
| 18 | Hematocrit, mean (SD) (n = 33)                                         | 374.8 (120.2)         | 392.6 (109.3)    | 295.2 (144.8)  | <b>0.0497</b>                 |
| 19 | Thrombocytes (/μl), mean (SD) (n = 32)                                 | 245.2 (63.83)         | 235.8 (61.47)    | 285.8 (62.65)  | 0.1055                        |
| 20 | Leukocytes (/μl), mean (SD) (n = 33)                                   | 618.3 (267.9)         | 677 (211.9)      | 354 (351.5)    | <b>0.0055</b>                 |
| 21 | ACE inhibitor /AT1 blocker, No. (%) (n = 32)                           | 18 (56.25)            | 13 (50.00)       | 5 (83.33)      | 0.1959                        |
| 22 | Aldosterone blocker, No. (%) (n = 32)                                  | 18 (56.25)            | 14 (53.85)       | 4 (66.67)      | 0.6722                        |
| 23 | Betablocker, No. (%) (n = 32)                                          | 27 (84.38)            | 21 (80.77)       | 6 (100)        | 0.5546                        |
| 24 | Statin, No. (%) (n = 32)                                               | 21 (65.63)            | 17 (65.38)       | 4 (66.67)      | >0.9999                       |
| 25 | Diuretics, No. (%) (n = 32)                                            | 13 (40.63)            | 9 (34.62)        | 4 (66.67)      | 0.1937                        |

Data are shown as mean ± SD (1, 3, 4, 13-20) or as counts (percentage of the group, %) (2, 5-12, 21-25). Normal distribution was assessed using the Shapiro–Wilk test (1, 3, 4, 13-20). Statistical analysis for the comparison of

two groups was performed using a two-tailed Mann–Whitney test for data not following a Gaussian distribution and an unpaired, two-sided Student's t-tests (1, 3, 4, 13-20). Fischer exact tests were used for proportions (2, 5-12, 21-25).

NYHA, New York Heart Association; NT-proBNP, N-terminal-pro-Brain Natriuretic Peptide.

## Supplementary Table 2. Baseline characteristics of the cMRI study cohort

### cMRI findings

|   | Characteristic                                        | Total Cohort (n = 38) | No-CHIP (n = 32) | CHIP (n = 6)  | P value (CHIP versus NO CHIP) |
|---|-------------------------------------------------------|-----------------------|------------------|---------------|-------------------------------|
| 1 | LVEF (%), mean (SD) (n = 35)                          | 34.06 (9.11)          | 34.83 (9.22)     | 30.33 (8.287) | 0.5561                        |
| 2 | LV-EDVi (mL/m <sup>2</sup> ), mean (SD) (n = 33)      | 113.6 (40.14)         | 111.1 (40.3)     | 124.5 (41.15) | 0.4699                        |
| 3 | LV mass index (g/m <sup>2</sup> ), mean (SD) (n = 32) | 73.03 (31.53)         | 75.23 (33.76)    | 63.5 (18.2)   | 0.3864                        |
| 4 | RVEF (%), mean (SD) (n = 34)                          | 43.26 (11.14)         | 44.18 (11.49)    | 39 (8.922)    | 0.3085                        |
| 5 | Native T1 (ms), mean (SD) (n = 33)                    | 1146 (96.64)          | 1131 (97.46)     | 1214 (61.15)  | <b>0.0497</b>                 |
| 6 | Native T2 (ms), mean (SD) (n = 33)                    | 39.42 (4.10)          | 39.41 (4.00)     | 39.5 (4.93)   | 0.7754                        |
| 7 | Pericardial effusion, No. (%) (n = 35)                | 11 (31.42)            | 8 (26.67)        | 3 (60.00)     | 0.297                         |
| 8 | LGE, No (%) (n = 30)                                  | 21 (70.00)            | 17 (70.83)       | 4 (66.67)     | >0.9999                       |

Data are shown as mean  $\pm$  SD (1-3, 5-6) or as counts (percentage of the group, %) (7-8). Normal distribution was assessed using the Shapiro–Wilk test (1-3, 5-6). Statistical analysis for the comparison of two groups was performed using a two-tailed Mann–Whitney test for data not following a Gaussian distribution and an unpaired, two-sided Student's t-tests (1-3, 5-6). Fischer exact tests were used for proportions (7-8).

LVEF, left ventricular ejection fraction; LV- EDVi, left ventricular end-diastolic volume, indexed to body surface area; LV - left ventricular; RVEF, reduced right ventricular ejection fraction; LGE, late gadolinium enhancement.

**Supplementary Table 3. Baseline characteristics of the serum study cohort**

|    | Characteristic                                                                        | Total Cohort (n = 20) | No-CHIP (n = 10) | CHIP (n = 10)    | P value (CHIP versus NO CHIP) |
|----|---------------------------------------------------------------------------------------|-----------------------|------------------|------------------|-------------------------------|
| 1  | Age, mean (SD) (n = 20)                                                               | 67.25 (11.15)         | 66.30 (11.95)    | 68.2 (10.84)     | 0.714                         |
| 2  | Male, No. (%) (n = 20)                                                                | 18.00 (90.00)         | 9.00 (90.00)     | 9.00 (90.00)     | >0.9999                       |
| 3  | Weight (kg), mean (SD) (n = 39)                                                       | 83.60 (17.30)         | 88.73 (20.75)    | 77.90 (10.77)    | 0.1788                        |
| 4  | Size (cm), mean (SD) (n = 17)                                                         | 171.60 (7.86)         | 172.20 (9.01)    | 171.00 (6.89)    | 0.7601                        |
| 5  | Hypertension, No. (%) (n = 18)                                                        | 12.00 (66.67)         | 5.00 (55.56)     | 7.00 (77.78)     | 0.6199                        |
| 6  | Diabetes mellitus, No. (%) (n = 20)                                                   | 10.00 (50.00)         | 5.00 (50.00)     | 5.00 (50.00)     | >0.9999                       |
| 7  | Smoking, No. (%) (n = 19)                                                             | 11.00 (57.89)         | 5.00 (50.00)     | 6.00 (66.67)     | 0.6499                        |
| 8  | Valve disease, No. (%) (n = 17)                                                       | 2.00 (11.76)          | 2.00 (18.18)     | 0.00 (0.00)      | 0.4854                        |
| 9  | Coronary artery disease, No. (%) (n = 20)                                             | 19.00 (95.00)         | 9.00 (90.00)     | 10.00 (100.00)   | >0.9999                       |
| 10 | Myocardial infarction, No. (%) (n = 20)                                               | 12.00 (60.00)         | 6.00 (60.00)     | 6.00 (60.00)     | >0.9999                       |
| 11 | NYHA class, mean (SD) (n=13)                                                          | 1.89 (0.92)           | 1.80 (1.09)      | 1.94 (0.86)      | 0.9068                        |
| 12 | LVEF (%), No. (%) (n = 20)                                                            | 38.50 (9.61)          | 39.00 (9.37)     | 38.00 (10.33)    | 0.7799                        |
| 13 | NT-proBNP serum levels (pg/ml), mean (SD) (n = 20)                                    | 941.07 (811.80)       | 836.20 (821.10)  | 1047.00 (832.00) | 0.4935                        |
| 14 | Hemoglobin (g/dl), mean (SD) (n = 33)                                                 | 13.35 (1.96)          | 13.76 (1.20)     | 12.94 (2.51)     | 0.3635                        |
| 15 | Thrombocytes (/μl), mean (SD) (n = 20)                                                | 446.80 (801.20)       | 240.80 (62.42)   | 652.80 (1121.00) | 0.255                         |
| 16 | Leukocytes (/μl), mean (SD) (n = 20)                                                  | 8.57 (2.28)           | 8.06 (2.76)      | 9.08 (1.66)      | 0.3297                        |
| 17 | Renin-Angiotensin-Aldosterone blockade - ACE inhibitor /AT1 blocker, No. (%) (n = 20) | 14.00 (70.00)         | 8.00 (80.00)     | 6.00 (60.00)     | 0.6285                        |
| 18 | Renin-Angiotensin-Aldosterone blockade - Aldosterone blocker, No. (%) (n = 20)        | 10.00 (50.00)         | 4.00 (40.00)     | 6.00 (60.00)     | 0.6563                        |
| 19 | Betablocker, No. (%) (n = 20)                                                         | 19.00 (95.00)         | 9.00 (90.00)     | 10.00 (100.00)   | >0.9999                       |
| 20 | Statin, No. (%) (n = 32)                                                              | 20.00 (100.00)        | 10.00 (100.00)   | 10.00 (100.00)   | >0.9999                       |

Data are shown as mean  $\pm$  SD (1,3-4; 11; 13-16) or as counts (percentage of the group, %) (2,5-10,17-20). Normal distribution was assessed using the Shapiro–Wilk test (1,3-4; 11; 13-16). Statistical analysis for the comparison of two groups was performed using a two-tailed Mann–Whitney test for data not following a Gaussian distribution and an unpaired, two-sided Student's t-tests (1,3-4; 11; 13-16). Fischer exact tests were used for proportions (2,5-10,17-20).

NYHA, New York Heart Association; LVEF, left ventricular ejection fraction; NT-proBNP, N-terminal-pro-Brain Natriuretic Peptide.
